# Supplementary material
Source: publisher site journal article supplement (https://www.degruyterbrill.com/publication/isbn/9783110728835/downloadAsset/9783110728835_Online-Anhang.pdf)
Supplement: Supplementary file 1 [file 9783110728835_Online-Anhang.pdf]

# Online-Anhang

## Online-Anhang A: 23 Textportfolios (sortiert nach Alter)

| Pseudonym | Kürzel | Alter | Schule | Schultexte Tokens | Schultexte mit Siglen                                                                                                                                        | WhatsApp-Chats Tokens | WhatsApp-Chats-Siglen Tokens in Klammern               |
|-----------|--------|-------|--------|-------------------|--------------------------------------------------------------------------------------------------------------------------------------------------------------|-----------------------|--------------------------------------------------------|
| Marco     | MAR    | 13    | SH01   | 366               | MAR-S1 (Deutscharbeit)<br>MAR-S2 (Deutscharbeit)                                                                                                             | 753                   | MAR-W1 (586) /<br>MAR-W2 (167)                         |
| Jessica   | JES    | 13    | SH01   | 995               | JES-S1 (Tagebucheintrag Deutsch-<br>unterricht)<br>JES-S2 (Tagebucheintrag Deutsch-<br>unterricht)<br>JES-S3 (Chemiehausarbeit)<br>JES-S4 (Geographiearbeit) | 3.964                 | JES-W1 (1.388) /<br>JES-W2 (1.064) /<br>JES-W3 (1.512) |
| Madie     | MAD    | 13    | SH01   | 405               | MAD-S1 (Deutscharbeit)                                                                                                                                       | 8.338                 | MAD-W1 (8.338)                                         |
| Konrad    | KON    | 13    | HH02   | 468               | KON-S1 (Deutschhausarbeit)<br>KON-S2 (Deutschtest)                                                                                                           | 3.032                 | KON-W1 (958) /<br>KON-W2 (2.074)                       |
| Otto      | OTT    | 14    | HH02   | 131               | OTT-S1 (Deutschhausarbeit)                                                                                                                                   | 7.408                 | OTT-W1 (1.842) /<br>OTT-W2 (5.566)                     |
| Marcel    | MAC    | 14    | SH01   | 628               | MAC-S1 (Deutscharbeit)<br>MAC-S2 (Deutscharbeit)                                                                                                             | 10.480                | MAC-W1 (8.112) /<br>MAC-W2 (2.368)                     |
| Alma      | ALM    | 14    | SH01   | 1.242             | ALM-S1 (Deutschhausarbeit)<br>ALM-S2 (Deutscharbeit)<br>ALM-S3 (Geographiemitschrift)<br>ALM-S4 (Tagebucheintrag<br>Deutschunterricht)                       | 558                   | ALM-W1 (182) /<br>ALM-W2 (376)                         |

|           |     |    |      |       |                                                                                                                                                                                     |        |                                                                |
|-----------|-----|----|------|-------|-------------------------------------------------------------------------------------------------------------------------------------------------------------------------------------|--------|----------------------------------------------------------------|
| Elisabeth | ELI | 14 | SH01 | 614   | ELI-S1 (Deutscharbeit)<br>ELI-S2 (Politikhausarbeit)                                                                                                                                | 3.958  | ELI-W1<br>(2.133) /<br>ELI-W2<br>(1.825)                       |
| Klara     | KLA | 14 | HH01 | 844   | KLA-S1 (Brief in Deutschunterricht)<br>KLA-S2 (Geographiehausarbeit)<br>KLA-S3 (Deutscharbeit)                                                                                      | 425    | KLA-W1 (8)<br>/ KLA-W2<br>(417)                                |
| Lea       | LEA | 14 | HH02 | 203   | LEA-S1 (Deutschtest)                                                                                                                                                                | 944    | LEA-W1<br>(310) / LEA-<br>W2 (634)                             |
| Ina       | INA | 14 | HH01 | 824   | INA-S1 (Deutscharbeit)<br>INA-S2 (Geographiehausarbeit)<br>INA-S3 (Deutschhausarbeit)                                                                                               | 2.055  | INA-W1 (43)<br>/ INA-W2<br>(2.012)                             |
| Janne     | JAN | 14 | SH01 | 1.106 | JAN-S1 (Deutscharbeit)<br>JAN-S2 (Politikhausarbeit)<br>JAN-S3 (Deutscharbeit)<br>JAN-S4 (Chemiehausarbeit)                                                                         | 30.859 | JAN-W1<br>(17.097) /<br>JAN-W2<br>(13.762)                     |
| Kunzang   | KUN | 14 | HH02 | 219   | KUN-S1 (Biologietest)                                                                                                                                                               | 5.286  | KUN-W1<br>(3.456) /<br>KUN-W2<br>(1.830)                       |
| Nadine    | NAD | 14 | SH01 | 301   | NAD-S1 (Tagebucheintrag im<br>Deutschunterricht)<br>NAD-S2 (Deutschhausarbeit)<br>NAD-S3 (Geschichtsarbeit)<br>NAD-S4 (Politikhausarbeit)                                           | 6.039  | NAD-W1<br>(5.184) /<br>NAD-W2<br>(855)                         |
| Anne      | ANE | 14 | HH02 | 352   | ANE-S1 (Deutschhausarbeit)<br>ANE-S2 (Deutschhausarbeit)<br>ANE-S2 (Hausaufgabennotizen)                                                                                            | 14.905 | ANE-W1<br>(322) /<br>ANE-W2<br>(13.482) /<br>ANE-W3<br>(1.101) |
| Lisa      | LIS | 14 | HH02 | 963   | LIS-S1 (Biologietest)<br>LIS-S2 (Deutschtest)<br>LIS-S3 (Hausaufgabennotizen)<br>LIS-S4 (Deutscharbeit)                                                                             | 14.511 | LIS-W1<br>(12.096) /<br>LIS-W2<br>(2.415)                      |
| Tobias    | TOB | 15 | HH01 | 1.257 | TOB-S1 (Deutschklausur)<br>TOB-S2 (Brief in Deutschklausur)<br>TOB-S3 (Biologiearbeit)<br>TOB-S4 (Biologiehausarbeit)<br>TOB-S5 (Biologiehausarbeit)<br>TOB-S6 (Biologiehausarbeit) | 2.309  | TOB-W1<br>(2.062) /<br>TOB-W2<br>(247)                         |

|         |     |    |       |       |                                                                                                                                                                                                                 |        |                                          |
|---------|-----|----|-------|-------|-----------------------------------------------------------------------------------------------------------------------------------------------------------------------------------------------------------------|--------|------------------------------------------|
| Benni   | BEN | 16 | HH01  | 846   | BEN-S1 (Geographiearbeit)<br>BEN-S2 (Deutscharbeit)<br>BEN-S3 (Deutscharbeit)<br>BEN-S4 (Deutscharbeit)                                                                                                         | 2.289  | BEN-W1<br>(502) /<br>BEN-W2<br>(1.787)   |
| Julian  | JUL | 16 | P.-T. | 1.718 | JUL-S1 (Geschichtsarbeit)<br>JUL-S2 (Chemiehausarbeit)<br>JUL-S3 (Geschichtshausarbeit)<br>JUL-S4 (Biologiehausarbeit)<br>JUL-S5 (Biologiehausarbeit)<br>JUL-S6 (Chemiehausarbeit)<br>JUL-S7 (Chemiehausarbeit) | 604    | JUL-W1 (64)<br>/ JUL-W2<br>(540)         |
| Frank   | FRA | 17 | HH01  | 3.895 | FRA-S1 (Deutschhausarbeit)<br>FRA-S2 (Philosophiearbeit)<br>FRA-S3 (Deutschhausarbeit)<br>FRA-S4 (Deutschhausarbeit)<br>FRA-S5 (Deutscharbeit)<br>FRA-S6 (Mathemitschrift)<br>FRA-S7 (Brief in Deutscharbeit)   | 8.134  | FRA-W1<br>(962) / FRA-<br>W2 (7.172)     |
| Jana    | JNA | 17 | SH01  | 1.352 | JNA-S1 (Deutscharbeit)<br>JNA-S2 (Biologiehausarbeit)<br>JNA-S3 (Biologiehausarbeit)                                                                                                                            | 14.164 | JNA-W1<br>(5.062) /<br>JNA-W2<br>(9.102) |
| Melanie | MEL | 17 | HH01  | 2.129 | MEL-S1 (Deutscharbeit)<br>MEL-S2 (Brief in Deutscharbeit)<br>MEL-S3 (Deutscharbeit)<br>MEL-S4 (Politikhausarbeit)<br>MEL-S5 (Politikhausarbeit)                                                                 | 1.344  | MEL-W1<br>(494) /<br>MEL-W2<br>(850)     |
| Nils    | NIL | 18 | P.-T. | 2.062 | NIL-S1 (Geographiearbeit)<br>NIL-S2 (Philosophiearbeit)                                                                                                                                                         | 9.611  | NIL-W1<br>(6.389) /<br>NIL-W2<br>(3.222) |

---

## Online-Anhang B: Fragebogen

Bitte fülle den Fragebogen alleine und möglichst vollständig aus. Der Fragebogen ist anonym. Es gibt keine richtigen oder falschen Antworten. Wir möchten wissen, wie Deine eigenen Erfahrungen mit dem alltäglichen Schreiben sind. Wenn bei einer Frage mehrere Antworten für Dich zutreffen, kreuzt Du diese bitte alle an.

**Alter:** \_\_\_\_\_

**Geschlecht:** ☐ männlich ☐ weiblich

### 1. In welchen alltäglichen Situationen schreibst Du?

---

---

---

### 2. Wie viele Minuten verbringst Du täglich insgesamt mit dem Schreiben per Hand?

\_\_\_\_\_ Minuten

### 3. Wie viele Minuten verbringst Du täglich insgesamt mit dem Schreiben am Computer oder Laptop?

\_\_\_\_\_ Minuten

### 4. Wie viele Minuten verbringst Du täglich insgesamt mit dem Schreiben am Handy oder Smartphone?

\_\_\_\_\_ Minuten

### 5. Nutzt Du WhatsApp?

☐ ja ☐ nein

**Falls Du ‚nein‘ angekreuzt hast, gehe zu Frage Nr. 9.**

**6. Wie häufig schreibst Du bei WhatsApp?**

- ☐ selten (1 bis 5x im Monat)      ☐ gelegentlich (1 bis 5x in der Woche)  
☐ oft (1 bis 5x am Tag)      ☐ sehr oft (mehr als 5x am Tag)

**7. Mit wem schreibst Du bei WhatsApp?**

- ☐ mir selbst    ☐ Familie    ☐ Freunde    ☐ Lehrer    ☐ Unbekannte

**8. In welchen Situationen schreibst Du bei WhatsApp?**

- ☐ morgens vor der Schule      ☐ auf dem Schulweg  
☐ während des Unterrichts      ☐ in den Schulpausen  
☐ zu Hause in meiner Freizeit      ☐ während der Hausaufgaben  
☐ sonstige, nämlich \_\_\_\_\_

**9. Schreibst Du E-Mails?**

- ☐ ja      ☐ nein

**Falls Du ‚nein‘ angekreuzt hast, gehe zu Frage Nr. 13.**

**10. Wie häufig schreibst Du E-Mails?**

- ☐ selten (1 bis 5x im Monat)      ☐ gelegentlich (1 bis 5x in der Woche)  
☐ oft (1 bis 5x am Tag)      ☐ sehr oft (mehr als 5x am Tag)

**11. Für wen schreibst Du E-Mails?**

- ☐ mich selbst    ☐ Familie    ☐ Freunde    ☐ Lehrer    ☐ Unbekannte

**12. In welchen Situationen schreibst Du E-Mails?**

- ☐ morgens vor der Schule      ☐ auf dem Schulweg  
☐ während des Unterrichts      ☐ in den Schulpausen  
☐ zu Hause in meiner Freizeit      ☐ während der Hausaufgaben  
☐ sonstige, nämlich \_\_\_\_\_

**13. Schreibst Du bei Instagram?**

- ☐ ja      ☐ nein

**Falls Du ‚nein‘ angekreuzt hast, gehe zu Frage Nr. 17.**

**14. Wie häufig schreibst Du bei Instagram?**

- ☐ selten (1 bis 5x im Monat)      ☐ gelegentlich (1 bis 5x in der Woche)  
☐ oft (1 bis 5x am Tag)      ☐ sehr oft (mehr als 5x am Tag)

**15. Für wen schreibst Du bei Instagram?**

- ☐ mich selbst    ☐ Familie    ☐ Freunde    ☐ Lehrer    ☐ Unbekannte

**16. In welchen Situationen schreibst Du bei Instagram?**

- ☐ morgens vor der Schule      ☐ auf dem Schulweg  
☐ während des Unterrichts      ☐ in den Schulpausen  
☐ zu Hause in meiner Freizeit      ☐ während der Hausaufgaben  
☐ sonstige, nämlich \_\_\_\_\_

**17. Schreibst Du bei YouTube?**

- ☐ ja      ☐ nein

**Falls Du ‚nein‘ angekreuzt hast, gehe zu Frage Nr. 21.**

**18. Wie häufig schreibst Du bei YouTube?**

- ☐ selten (1 bis 5x im Monat)      ☐ gelegentlich (1 bis 5x in der Woche)  
☐ oft (1 bis 5x am Tag)      ☐ sehr oft (mehr als 5x am Tag)

**19. Für wen schreibst Du bei YouTube?**

- ☐ mich selbst    ☐ Familie    ☐ Freunde    ☐ Lehrer    ☐ Unbekannte

**20. In welchen Situationen schreibst Du bei YouTube?**

- ☐ morgens vor der Schule      ☐ auf dem Schulweg  
☐ während des Unterrichts      ☐ in den Schulpausen  
☐ zu Hause in meiner Freizeit      ☐ während der Hausaufgaben  
☐ sonstige, nämlich \_\_\_\_\_

**21. Schreibst Du in Chatprogrammen (z.B. im Facebook-Messenger, iMessage)?**

- ☐ ja      ☐ nein

**Falls Du ‚nein‘ angekreuzt hast, gehe zu Frage Nr. 25.**

**22. Wie häufig schreibst Du in Chatprogrammen?**

- ☐ selten (1 bis 5x im Monat)      ☐ gelegentlich (1 bis 5x in der Woche)  
☐ oft (1 bis 5x am Tag)      ☐ sehr oft (mehr als 5x am Tag)

**23. Mit wem schreibst Du in Chatprogrammen?**

- ☐ mir selbst    ☐ Familie    ☐ Freunde    ☐ Lehrer    ☐ Unbekannte

**24. In welchen Situationen schreibst Du in Chatprogrammen?**

- ☐ morgens vor der Schule      ☐ auf dem Schulweg  
☐ während des Unterrichts      ☐ in den Schulpausen  
☐ zu Hause in meiner Freizeit    ☐ während der Hausaufgaben  
☐ sonstige, nämlich \_\_\_\_\_

**25. Schreibst Du Briefe?**

- ☐ ja      ☐ nein

**Falls Du ‚nein‘ angekreuzt hast, gehe zu Frage Nr. 29.**

**26. Wie häufig schreibst Du Briefe?**

- ☐ selten (1 bis 5x im Monat)      ☐ gelegentlich (1 bis 5x in der Woche)  
☐ oft (1 bis 5x am Tag)      ☐ sehr oft (mehr als 5x am Tag)

**27. Für wen schreibst Du Briefe?**

- ☐ mich selbst    ☐ Familie    ☐ Freunde    ☐ Lehrer    ☐ Unbekannte

**28. In welchen Situationen schreibst Du Briefe?**

- ☐ morgens vor der Schule      ☐ auf dem Schulweg  
☐ während des Unterrichts      ☐ in den Schulpausen  
☐ zu Hause in meiner Freizeit      ☐ während der Hausaufgaben  
☐ sonstige, nämlich \_\_\_\_\_

**29. Schreibst Du ein Tagebuch?**

- ☐ ja      ☐ nein

**Falls Du ‚nein‘ angekreuzt hast, gehe zu Frage Nr. 33.**

**30. Wie häufig schreibst Du in Dein Tagebuch?**

- ☐ selten (1 bis 5x im Monat)      ☐ gelegentlich (1 bis 5x in der Woche)  
☐ oft (1 bis 5x am Tag)      ☐ sehr oft (mehr als 5x am Tag)

**31. Für wen schreibst Du in Dein Tagebuch?**

- ☐ mich selbst      ☐ Familie      ☐ Freunde      ☐ Lehrer      ☐ Unbekannte

**32. In welchen Situationen schreibst Du in Dein Tagebuch?**

- ☐ morgens vor der Schule      ☐ auf dem Schulweg  
☐ während des Unterrichts      ☐ in den Schulpausen  
☐ zu Hause in meiner Freizeit      ☐ während der Hausaufgaben  
☐ sonstige, nämlich \_\_\_\_\_

**33. Schreibst Du Status Updates bei Facebook?**

- ☐ ja      ☐ nein

**Falls Du ‚nein‘ angekreuzt hast, gehe zu Frage Nr. 37.**

**34. Wie häufig schreibst Du Status Updates?**

- ☐ selten (1 bis 5x im Monat)      ☐ gelegentlich (1 bis 5x in der Woche)  
☐ oft (1 bis 5x am Tag)      ☐ sehr oft (mehr als 5x am Tag)



**35. Für wen schreibst Du Status Updates?**

- ☐ mich selbst    ☐ Familie    ☐ Freunde    ☐ Lehrer    ☐ Unbekannte

**36. In welchen Situationen schreibst Du Status Updates?**

- ☐ morgens vor der Schule    ☐ auf dem Schulweg  
☐ während des Unterrichts    ☐ in den Schulpausen  
☐ zu Hause in meiner Freizeit    ☐ während der Hausaufgaben  
☐ sonstige, nämlich \_\_\_\_\_

**37. Schreibst Du Notiz-Zettel?**

- ☐ ja    ☐ nein

Falls Du ‚nein‘ angekreuzt hast, gehe zu Frage Nr. 41.

**38. Wie häufig schreibst Du Notiz-Zettel?**

- ☐ selten (1 bis 5x im Monat)    ☐ gelegentlich (1 bis 5x in der Woche)  
☐ oft (1 bis 5x am Tag)    ☐ sehr oft (mehr als 5x am Tag)

**39. Für wen schreibst Du Notiz-Zettel?**

- ☐ mich selbst    ☐ Familie    ☐ Freunde    ☐ Lehrer    ☐ Unbekannte

**40. In welchen Situationen schreibst Du Notiz-Zettel?**

- ☐ morgens vor der Schule    ☐ auf dem Schulweg  
☐ während des Unterrichts    ☐ in den Schulpausen  
☐ zu Hause in meiner Freizeit    ☐ während der Hausaufgaben  
☐ sonstige, nämlich \_\_\_\_\_

**41. Schreibst Du SMS?**

- ☐ ja    ☐ nein

Falls Du ‚nein‘ angekreuzt hast, gehe zu Frage Nr. 45.

**42. Wie häufig schreibst Du SMS?**

- ☐ selten (1 bis 5x im Monat)      ☐ gelegentlich (1 bis 5x in der Woche)  
☐ oft (1 bis 5x am Tag)      ☐ sehr oft (mehr als 5x am Tag)

**43. Für wen schreibst Du SMS?**

- ☐ mich selbst    ☐ Familie    ☐ Freunde    ☐ Lehrer    ☐ Unbekannte

**44. In welchen Situationen schreibst Du SMS?**

- ☐ morgens vor der Schule      ☐ auf dem Schulweg  
☐ während des Unterrichts      ☐ in den Schulpausen  
☐ zu Hause in meiner Freizeit    ☐ während der Hausaufgaben  
☐ sonstige, nämlich \_\_\_\_\_

**45. Schreibst Du in Computerspielen?**

- ☐ ja      ☐ nein

**Falls Du ‚nein‘ angekreuzt hast, gehe zu Frage Nr. 49.**

**46. Wie häufig schreibst Du in Computerspielen?**

- ☐ selten (1 bis 5x im Monat)      ☐ gelegentlich (1 bis 5x in der Woche)  
☐ oft (1 bis 5x am Tag)      ☐ sehr oft (mehr als 5x am Tag)

**47. Für wen schreibst Du in Computerspielen?**

- ☐ mich selbst    ☐ Familie    ☐ Freunde    ☐ Lehrer    ☐ Unbekannte

**48. In welchen Situationen schreibst Du in Computerspielen?**

- ☐ morgens vor der Schule      ☐ auf dem Schulweg  
☐ während des Unterrichts      ☐ in den Schulpausen  
☐ zu Hause in meiner Freizeit    ☐ während der Hausaufgaben  
☐ sonstige, nämlich \_\_\_\_\_

**49. In der Freizeit schreibst Du am meisten...**

- ☐ handschriftlich    ☐ am Computer    ☐ mit dem Handy/Smartphone

**50. In Deiner Freizeit schreibst Du am meisten für...**

☐ mich selbst    ☐ Freunde    ☐ Eltern und Familie    ☐ Unbekannte

**51. Wenn Du in der Freizeit schreibst, ist Dir Rechtschreibung...**

☐ egal    ☐ eher nicht wichtig    ☐ eher wichtig    ☐ sehr wichtig

**52. Liest Du geschriebene Texte am Handy/Smartphone Korrektur, bevor Du sie verschickst?**

☐ nie    ☐ selten    ☐ häufig    ☐ immer

**53. Liest Du geschriebene Texte am Computer Korrektur, bevor Du sie verschickst?**

☐ nie    ☐ selten    ☐ häufig    ☐ immer

**54. Was unterscheidet das Schreiben in der Freizeit vom Schreiben in der Schule?**

---

---

**55. Wie haben sich Deine Schreibgewohnheiten verändert, seitdem Du ein Smartphone besitzt?**

---

---

**56. Was möchtest Du uns noch zu diesem Fragebogen sagen?**

---

---

Vielen Dank, dass Du uns mit der Beantwortung des Fragebogens geholfen hast!

## Online-Anhang C: Codebuch der Textportfolio-Erstcodierung

### 1. Graphemische Varianten

#### 1.1 Stilistische Schreibungen

##### 1.1.1 Graphemsubstitution

Bsp. 1: Boyz

Bsp. 2: pöse (=böse)

##### 1.1.2 Regionalmerkmal

Bsp. 1: *beschte* (= beste)

Bsp. 2: *dat* (= das)

##### 1.1.3 Elision

Bsp. 1: *ich hab*

Bsp. 2: *ne Frage*

##### 1.1.4 Kontraktion

Bsp. 1: *Machs dann morgen*

Bsp. 2: *weil's ein bisschen kalt ist*

##### 1.1.5 Insertion

Bsp. 1: *jaha* (= ja)

Bsp. 2: *fünef* (= fünf)

#### 1.2 Kurzformen

##### 1.2.1 Initialismus

Bsp. 1: *YOLO*

Bsp. 2: *OMG*

##### 1.2.2 Konsonantenschreibung

Bsp. 1: *trtzdm* (=trotzdem)

Bsp. 2: *nmnd* (=niemand)

##### 1.2.3 Rebusschreibung

Bsp. 1: *Gute N8*

Bsp. 2: *cu* (=see you)

##### 1.2.4 Logogramm

Bsp. 1: *xoxo* (= Küsse)

Bsp. 2: *@* (= at)

#### 1.3 Fehlschreibungen

##### 1.3.1 Graphem-Phonem

Bsp. 1: *hüpsch*

Bsp. 2: *vileicht*

**1.3.2 Artikel/Konjunktion**

Bsp. 1: *Es kann sein das ein neuer Baum wächst*

**1.3.3 Tippfehler**

Bsp. 1: *Löscht du ihn jetzr*

Bsp. 2: *Hat sie dich schon anferufen*

**1.3.4 Groß-/Kleinschreibung**

**1.3.4.1 Konsequente Kleinschreibung**

(Wird nur einmal pro Dokument codiert / Ausnahmen innerhalb des Dokuments werden als Ausnahme-Großschreibung codiert)

**1.3.4.2 Ausnahme-Großschreibung**

(in Dokumenten, die bereits mit konsequenter Kleinschreibung codiert sind)

**1.3.4.3 Kleinschreibung am Satzanfang**

Bsp. 1: *er hatte sich ein wenig mehr erhofft.*

**1.3.4.4 Fehlerhafte Großschreibung**

Bsp. 1: *Der Sauerstoff wird mit Produziert.*

Bsp. 2: *Supii Dan bis villeicht später*

**1.3.4.5 Substantivkleinschreibung**

**1.3.5 Getrennt-/Zusammenschreibung**

Bsp. 1: *Dosen Kuchen*

Bsp. 2: *einwenig*

**1.4 Linear-supragraphemische Schreibungen**

**1.4.1 Graphemiteration**

Bsp. 1: *sooooooooo*

Bsp. 2: *biiiiiiiitte*

**1.4.2 Versalienschreibung**

Bsp. 1: *SOFORT*

Bsp. 2: *SOOO SAU HÄSSLICH*

**2. Interpunktion**

**2.1 Punkt**

**2.1.1 Konsequente Auslassung von Punkten**

(nur einmal im Dokument codieren)

**2.1.2 Ausnahmepunkt**

(Punktgebrauch in Dokumenten, die mit konsequenter Auslassung codiert sind)

**2.2 Komma**

**2.2.1 Konsequente Auslassung von Kommata**

(Wird nur einmal pro Dokument codiert)

**2.2.2 Ausnahme-Komma**

(Kommagebrauch in Dokumenten, die mit konsequenter Auslassung codiert sind)

**2.3 Fragezeichen**

**2.3.1 Frage mit Fragezeichen**

Bsp. 1: *Wo bist du?*

Bsp. 2: *Hä?*

**2.3.2 Frage ohne Fragezeichen**

**2.3.2.1 nicht-ambige Frage**

**2.3.2.1.1 W-Fragen**

Bsp. 1: *Warum sagst du das*

Bsp. 2: *Welcher Tag*

**2.3.2.1.2 V1-Satz**

Bsp. 1: *Löschst du ihn jetzt*

Bsp. 2: *Soll ich dir Baby Fotos senden*

**2.3.2.1.3 Tag question**

Bsp.: *Aber eigentlich sollten wir doch eine Aufgabe machen oder*

**2.3.2.1.4 Interjektion**

Bsp: *Hä*

**2.3.2.2 Ambige Frage**

Bsp. 1: *So um 15:30 Uhr*

Bsp. 2: *Und*

**2.3.3 Beitragswertiges Fragezeichen**

Bsp. 1: *?*

Bsp. 2: *???*

**2.4 Ausrufezeichen**

**2.4.1 Äußerung mit Ausrufezeichen**

Bsp. 1: *New Yorker Hose?!*

Bsp. 2: *Geh mir aus den Augen!*

**2.4.2 Beitragswertiges Ausrufezeichen**

Bsp. 1: *!*

Bsp. 2: *!!!!!!*

**2.5 Auslassungspunkte**

**2.5.1 Äußerung mit Auslassungspunkten**

Bsp. 1: *Tiere, Sonne, Pool,...*

Bsp. 2: *.. gerade sitzen*

**2.5.2 Beitragswertige Auslassungspunkte**

Bsp. 1: *...*

Bsp. 2: *.....*



## Online-Anhang D: Interviewleitfaden

### a) Segmentale Bildzeichen

#### 1. Stimulus 1

- 01 20:31:31: A Was machst du so?  
02 20:33:24: B Gerade nicht viel, du?! :)  
03 20:33:57: A Halt Hausaufgaben 😊

- 1.1 Was fällt euch an diesem Beispiel auf?
- 1.2 Aus welcher Situation könnte der Textausschnitt stammen?
- 1.3 Was könnt ihr mir über A und B sagen? Wie stehen die beiden zueinander?
- 1.4 Welche Bedeutung haben die Smileys in diesem Beispiel?
- 1.5 Werden Smileys nur in solchen Situationen genutzt oder fallen euch noch andere Schreibenlässe ein?
- 1.6 Nutzt ihr Smiley selbst?

#### 2. Stimulus 2

Das ist echt langweilig. Es ist  
jetzt schon 15:30 Uhr und ich  
habe noch nix gemacht außer  
Haare gewaschen und YouTube  
filme geguckt.

- 2.1 Was fällt euch an diesem Beispiel auf?
- 2.2 Wie lässt sich Eurer Meinung der Smiley in diesem Ausschnitt erklären? Was bedeutet er?
- 2.3 Sind Smileys auch in handschriftlichen Texten üblich?
- 2.4 Falls ja: In welchen handschriftlichen Texten könnt ihr euch Smiley vorstellen?

#### 3. Stimulus 3

- 01 15:57:05: A Ok ich muss zu Gitarre  
02 15:57:40: B Viel spaß bb 🎸  
03 15:58:37: A Danke BB

- 3.1 Was fällt euch an diesem Beispiel auf?
- 3.2 Welcher Unterschied besteht zwischen den Smileys und dem Gitarren-Emoji in diesem Beispiel?
- 3.3 In welchen Situationen verwendet man Emojis?
- 3.4 Glaubt ihr, dass man am Emoji-Gebrauch die Persönlichkeit des der Schreiberin oder des Schreibers erkennen kann?
- 3.5 Nutzt ihr Emojis selbst?



#### 4. Stimulus 4

|    |       |   |                             |
|----|-------|---|-----------------------------|
| 01 | 12:02 | A | Na❤️                        |
| 02 | 12:53 | B | Hi❤️                        |
| 03 | 17:06 | A | Wmds❤️                      |
| 04 | 17:25 | B | Wmds❤️                      |
| 05 | 18:08 | A | Wo❤️                        |
| 06 | 18:35 | B | Meier❤️                     |
| 07 | 18:46 | A | Cool❤️                      |
| 08 | 18:47 | B | Jetzt erstmal zu Mac's❤️😋🍔🍟 |
| 09 | 20:19 | A | 😋😋❤                         |

- 4.1 Was fällt euch an diesem Beispiel auf?
- 4.2 Was könnt ihr mir über A und B sagen? Wie stehen die beiden zueinander?
- 4.3 In welchen Situationen werden A und B in dieser Weise schreiben?
- 4.4 Was bedeutet das Herz-Emoji in diesem Beispiel?
- 4.5 Nutzt ihr das Herz-Emoji selbst?

#### b) Graphemische Variation

#### 5. Stimulus 5

|    |           |   |                                  |
|----|-----------|---|----------------------------------|
| 01 | 20:07:12: | A | Du magst C gerne SEHR gerne oder |
| 02 | 20:07:46: | B | Warum fragen mich das alle 😊     |
| 03 | 20:08:24: | A | Weil man das sooooooooo merkt    |
| 04 | 20:08:24: | B | Ist ja auch nicht schlimm        |

- 5.1 Was fällt euch an diesem Beispiel auf?
- 5.2 Aus welcher Situation könnte der Textausschnitt stammen?
- 5.3 Was könnt ihr mir über A und B sagen? Wie stehen die beiden zueinander?
- 5.4 Werden Buchstabenwiederholungen nur in solchen Situationen genutzt oder fallen euch noch andere Schreibenlässe ein?
- 5.5 Welche Bedeutung hat das 8-fache <o> in diesem Beispiel?
- 5.6 Wäre die Bedeutung mit 3-fachem oder auch mit 15-fachem <o> eine andere?
- 5.7 Nutzt ihr Buchstabenwiederholungen selbst?

#### 6. Stimulus 6

|    |           |   |                                                                    |
|----|-----------|---|--------------------------------------------------------------------|
| 01 | 09:21:57: | A | Ich glaube nicht das du das wirklich sehen wilt ..... 😊            |
| 02 | 09:23:11: | B | Ich Versichere dir das ich das wiiiiirrrrrkkllliicchh sehen will 😊 |
| 03 | 09:26:52: | A | Das ist soo peinlich                                               |

- 6.1 Wie würde B sich mündlich ausdrücken, wenn A ihm in dieser Situation gegenüber säße?

## b) Interpunktion

### 7. Stimulus 7

- 01 21:31:19: A *Weil du ihn dan ja bei wgatsapp haben könntest*  
02 21:30:51: B *hast du ihn*  
03 21:32:12: A *Nein*  
04 21:32:18: B *Dann möchte ich ihn auch nicht (das bedeutet aber nichts)*  
05 21:32:34: B *!!!!!!!!!!!!!!!!!!!!!!!!!!!!!!*

- 7.1 Was fällt euch an diesem Beispiel auf?  
7.2 Was bedeutet die Wiederholung von Ausrufezeichen?  
7.3 Macht es für euch einen Unterschied, wie häufig das Ausrufezeichen wiederholt wird?  
7.4 Kann man an der Verwendung von Ausrufezeichen erkennen, was für eine Persönlichkeit schreibt?  
7.5 In welchen Schreibsituationen können Ausrufezeichen werden Ausrufezeichen wiederholt? Wäre das z.B. auch in einem Text für die Schule oder in einer E-Mail an die Lehrerin oder den Lehrer denkbar?  
7.6 Seht ihr Unterschiede zur Wiederholung von Fragezeichen?  
7.7 Nutzt ihr die Wiederholung von Satzzeichen selbst?

### 8. Stimulus 8

- 01 16:18: A *Gibts eigentlich irgendeine Art plan?*  
02 16:19 B *Hmm nicht wirklich....*

- 8.1 Was fällt euch an diesem Beispiel auf?  
8.2 Aus welcher Situation könnte der Textausschnitt stammen?  
8.3 Könnt ihr mir erklären, was die vier Punkte am Ende von Bs Beitrag bedeuten?  
8.4 Nutzt ihr Auslassungspunkte in ähnlicher Weise?

### 9. Stimulus 9

- 01 18:23: A *Kann ich GTA starten oder wird das wahrscheinlich in 5minuten sein*  
02 18:23: B *In ca 10*  
03 18:23: B *...*  
04 18:23: A *Haha*  
05 18:23: A *Okay dann starte ich das nicht*

- 9.1 Haben die drei Punkte von B in diesem Beispiel dieselbe Bedeutung?  
9.2 Macht es einen Unterschied, ob man zwei, drei oder vier Punkte schreibt?  
9.3 Mit welchen Schreibsituationen verbindet ihr diese Wiederholung von Punkten?  
9.4 Warum beenden A und B ihre Sätze eigentlich nicht mit Punkten?

**10. Stimulus 10***Ich hätte morgen Zeit :)**Ich hätte morgen Zeit**Ich hätte morgen Zeit.*

- 10.1 Welche Unterschiede sehr ihr zwischen den drei verschiedenen Nachrichten?
- 10.2 Spielt der Punkt für euch beim Schreiben am Smartphone eine wichtige Rolle?
- 10.3 Welche Interpunktionszeichen sind für euer alltägliches Schreiben am wichtigsten?
- 10.4 Welche Interpunktionszeichen sind für euer schulisches Schreiben am wichtigsten?
- 10.5 Wir haben jetzt über Emojis, Buchstabenwiederholung und Zeichensetzung gesprochen. Fallen Euch noch andere besonderen Merkmale für das Schreiben am Smartphone ein?

**d) Kontextuelle Dimensionen des alltäglichen Schreibens****11. AdressatInnen/Beziehungskonstellationen**

- 11.1 Spielt es für euch beim Schreiben eine Rolle zu wissen, wer das Geschriebene lesen wird?
- 11.2 Gibt es eine bestimmte Art, wie ihr mit eurer/eurem besten Freundin/Freund oder eurer Mutter schreibt?
- 11.3 Schreibt ihr anders mit jemandem, mit dem ihr zum allerersten Mal chattet?
- 11.4 Gibt es eine typische Art und Weise, wie Jungen/Mädchen schreiben?

**12. Themen/Aktivitätstypen**

- 12.1 Glaubt ihr, dass das Thema, über das ihr schreibt, eine Rolle dafür spielt, welchen Schreibstil ihr verwendet? (Beispiel: Trauerfall)
- 12.2 Wie verändert sich der Schreibstil, wenn man mit einem Freund/einer Freundin Streit hat?
- 12.3 Habt ihr das Gefühl, ihr könntest am Schreibstil erkennen, ob ein Junge/ein Mädchen mit euch flirtet?

**13. Medien und Kommunikationsformen**

- 13.1 Spielt es eine Rolle für euren Schreibstil, ob ihr mit der Hand, mit dem Computer oder dem Smartphone schreibt?
- 13.2 Würdet ihr eurem besten Freund/eurer besten Freundin in einem handgeschriebenen Brief im selben Stil schreiben wie bei WhatsApp?
- 13.3 Angenommen ihr müsstet eurem Lehrer/eurer Lehrerin bei WhatsApp schreiben: Wie würdet ihr euch ausdrücken?

**e) Abstrahierende Endpunkte**

14. In den Medien heißt es häufig, dass Jugendliche, die viel mit dem Smartphone schreiben, schlechter in ihrer Rechtschreibung und Zeichensetzung werden (Beispiel Artikel/Überschrift „Apokalypse der deutschen Sprache?“). Was meint ihr dazu?
15. Denkt ihr, dass das Schreiben in Eurer Freizeit Auswirkungen auf das Schreiben in der Schule hat?
16. Wie würdet ihr beschreiben, welche unterschiedlichen Arten des Schreibens in eurem Alltag wichtig sind? Wie unterscheidet ihr diese verschiedenen Schreibstile?
